# Supplementary material for: Convergence of virulence and antimicrobial resistance in increasingly prevalent Escherichia coli ST131 papGII+ sublineages
Source: PubMed Central journal article supplement (PMC9334617; doi:10.1038/s42003-022-03660-x), 2022-07-28
Supplement: 42003_2022_3660_MOESM2_ESM.pdf [file 42003_2022_3660_MOESM2_ESM.pdf]

## Description of Additional Supplementary Files

**File name:** Supplementary Data 1

**Description:** Characteristics, metadata, and assembly metrics of bacterial isolates included in the main dataset.

**File name:** Supplementary Data 2

**Description:** Presence and absence of antimicrobial resistance genes identified in the main dataset isolates.

**File name:** Supplementary Data 3

**Description:** Characteristics, metadata, and assembly metrics of bacterial isolates included in the validation dataset.

**File name:** Supplementary Data 4

**Description:** Mutations in quinolone-resistance determining regions (QRDRs) in the main dataset isolates.
